# Supplementary material for: Caenorhabditis briggsae Recombinant Inbred Line Genotypes Reveal Inter-Strain Incompatibility and the Evolution of Recombination
Source: PLoS Genet. 2011 Jul 14;7(7):e1002174. doi: 10.1371/journal.pgen.1002174 (PMC3136444; doi:10.1371/journal.pgen.1002174)
Supplement: Table S2 — Analysis of possible inversions. Columns contain the SNP name, cb4 chromosome assignment, and cb4 chromosome assembly position of the 132 SNPs common to the AI-RIL and F2 RIL datasets. The genetic position (in centimorgans) of each marker in the AF16/HK104 and VT847×AF16 genetic maps, normalized to produce linkage groups of length 50 cM, is given. Blocks of markers that are nonrecombinant in one map but recombinant in the other, consistent with the expectation of an inversion, are boxed. Blocks of markers whose genetic order is inverted relative to the other map are shaded. (XLSX) [file pgen.1002174.s005.xlsx]

## Sheet: Sheet1
SNP	cb4 assembly data		MapManager Data
			AF16/HK104 AI-RIL	VT847xAF16 F2 RIL
	chr	chr_SNP_pos (bp)	genet_pos (cM) (normalized)	genet_pos (cM) (normalized)
cb4654	1	374967	0	0
cbv25636	1	908748	1.58157	0
cb45601	1	1260017	2.47045	0
cb15282	1	2043825	8.46397	3.09132
cb15284	1	2064468	8.81633	3.09132
cbv29577	1	2136473	9.53042	3.58847			markers nonrecombinant in one map; resolved in the other
cb16165	1	5246875	19.8902	12.5768
cb16059	1	5699778	20.065	12.5768
cb63977	1	10923823	25.93	15.2466			markers showing inverted genetic orientation between the maps
cb19655	1	11464782	29.9088	16.2583
cbv11284	1	11472576	29.9088	16.2583
cb37290	1	11476793	29.9088	16.2583
cb37279	1	11500100	29.9088	16.2583
cbv20005	1	13264712	42.0493	41.033
cb57858	1	13606387	44.9314	44.2972
cb57890	1	13661723	44.9314	44.2972
cb23738	1	13930943	47.2954	46.8914
cbv25999	1	14720534	49.4679	48.9883
cb788	1	14909244	49.4679	50
cb49478	1	15321286	50	50
cbv26680	2	1301320	0	0
cb70341	2	1957848	1.40692	7.90743
cb44149	2	2234093	4.0598	11.3348
cb44156	2	2234328	4.0598	11.3348
cb44178	2	2252184	4.66291	11.3348
cb55366	2	2672442	7.14727	12.1596
cb55364	2	2672574	7.14727	12.1596
cb55256	2	2945572	8.16554	12.9843
cb16739	2	5269819	15.2613	16.4629
cbv13858	2	5361740	15.6576	16.4629
cb22848	2	6525094	18.2595	17.2876
cbv15918	2	6541343	18.2595	18.1125
cb43460	2	7969556	19.6875	19.7908
cb3563	2	10816585	22.4907	20.6157
cbv27224	2	10890068	22.6889	20.6157
cb25655	2	11089904	23.2864	22.294
cb3574	2	11122612	23.2864	22.294
cb64479	2	11179687	23.4845	22.294
cb35297	2	12437179	27.2471	23.9723
cb5574	2	12885843	31.2529	28.4011
cb19271	2	13286754	33.4852	30.0507
cb26368	2	13819900	37.5716	34.354
cbv12985	2	14287339	41.8823	38.7829
cb37209	2	14390131	42.2817	39.6076
cb37206	2	14390232	42.2817	39.6076
cbv29049	2	14496657	43.4981	39.6076
cb37997	2	14530345	43.8975	40.4323
cb38018	2	14532395	43.8975	40.4323
cb64210	2	14661430	46.4011	40.4323
cbv28536	2	14815586	47.0042	41.2572
cbv28546	2	14912434	47.4036	42.0819
cb60065	2	15090177	48.0067	43.7602
cb12983	2	16383401	50	50
cb25141	3	1696854	0	0
cb25166	3	1741155	0.937763	0
cb37727	3	2943670	12.0772	15.9818
cb37708	3	2970659	12.3068	15.2902
cb37667	3	3009815	12.3068	13.9074
cbv32399	3	3458946	16.1291	26.2317
cbv6995	3	4594302	22.695	29.9445
cbv21209	3	7546418	26.8713	31.3516
cb5362	3	9721438	29.1966	31.3516
cbv33476	3	13438943	46.445	43.2527
cbv19066	3	14316458	50	50
cbv32851	3	14576522	50	50
cb40635	4	192563	0	0
cb40745	4	381054	0	0
cbv679	4	461608	0	0
cbv24603	4	2417693	5.9199	3.39737
cbv30072	4	2831526	8.22299	3.85616
cb65994	4	4230996	13.9019	6.25013
cbv26280	4	6005447	18.5948	7.1677
cb46785	4	8651175	20.6868	7.1677
cb46791	4	8688180	20.6868	7.1677
cb46793	4	8689479	20.6868	7.1677
cb46800	4	8849378	20.6868	7.1677
cbv5985	4	12095878	24.9023	7.62657
cbv28149	4	13255887	27.5407	8.08535
cb34531	4	14155254	29.8131	12.8767
cbv19538	4	14761586	35.8599	18.4768
cb58228	4	14820527	35.8599	19.9023
cb58238	4	14821661	35.946	19.9023
cbv33551	4	15512860	42.4371	23.9433
cbv30547	4	16582191	46.9371	50
cb55480	4	17206896	50	48.6075
cb55481	4	17209266	50	48.6075
cbv11673	5	1697387	0	0
cb8361	5	3635990	6.38899	4.2314
cbv23377	5	5805235	11.5732	5.60863
cbv31762	5	9268148	17.2024	12.4431
cbv12146	5	11621483	20.1635	13.8204
cbv25185	5	13013256	21.8585	15.1975
cb39278	5	13500836	22.7145	15.1975
cb39281	5	13667597	23.137	15.8742
cb19274	5	14297157	25.2603	15.8742
cb19275	5	14305508	25.6827	15.8742
cb36988	5	14348299	25.6827	15.8742
cb19373	5	14632186	26.7597	17.2514
cb19474	5	15013585	28.6928	20.1057
cbv30649	5	15925153	35.8411	22.2082
cb67811	5	16030856	36.2635	22.2082
cb11402	5	16271278	37.5394	22.8849
cb11399	5	16271441	37.5394	22.8849
cb32939	5	16308224	38.3954	24.2384
cbh44710	5	16360083	38.8179	24.2384
cb4799	5	16415760	39.2403	24.9151
cb70040	5	16476324	39.2403	24.9151
cb69561	5	16565178	40.0964	25.592
cbv33445	5	16591451	40.0964	25.592
cbv20155	5	16619332	40.5188	25.592
cb58962	5	16637485	40.9412	25.592
cb31477	5	16647961	40.9412	25.592
cb36676	5	16734431	41.1508	25.592
cbv32380	5	17599632	48.7215	41.4606
cb25802	5	17861443	50	50
cbv33533	6	704785	0	0
cb34809	6	788699	0	0
cb21766	6	1031733	0.307392	0
cb21234	6	1849896	1.85387	2.60733
cb11499	6	5440768	12.7374	12.1958
cb31515	6	5711201	13.357	12.1958
cb31522	6	5787878	13.357	12.1958
cb12375	6	6182806	13.6643	14.7583
cbv6098	6	6571584	15.5347	13.477
cb60419	6	6813917	16.1542	13.477
cbv30892	6	16834339	34.6171	33.1748
cb34097	6	19172161	44.3127	41.5874
cb34090	6	19174294	44.3127	41.5874
cb34088	6	19174440	44.3127	41.5874
cb34085	6	19174583	44.3127	41.5874
cb34082	6	19174737	44.3127	41.5874
cb51130	6	20384902	50	50
